# Supplementary material for: Cigarette Smoke Extract Disturbs Mitochondria-Regulated Airway Epithelial Cell Responses to Pneumococci
Source: MDPI journal article supplement (doi:10.3390/cells11111771), 2022-05-28
Supplement: s1 [file s1]

## **Supplementary Information**

### **Cigarette smoke extract disturbs mitochondria-regulated airway epithelial cell responses to pneumococci**

Mahyar Aghapour<sup>1,2</sup>, Christy B.M. Tulen<sup>3</sup>, Mohsen Abdi Sarabi<sup>4</sup>, Sönke Weinert<sup>4</sup>, Mathias Müsken<sup>5</sup>, Borna Relja<sup>6</sup>, Frederik-Jan van Schooten<sup>3</sup>, Andreas Jeron<sup>1,2</sup>, Rüdiger Braun-Dullaeus<sup>4</sup>, Alexander H Remels<sup>3</sup>, Dunja Bruder<sup>1,2</sup>

<sup>1</sup>Infection Immunology Group, Institute of Medical Microbiology, Infection Control and Prevention, Health Campus Immunology, Infectiology and Inflammation, Otto-von-Guericke University, Magdeburg, Germany

<sup>2</sup>Immune Regulation Group, Helmholtz Centre for Infection Research, Braunschweig, Germany

<sup>3</sup>Department of Pharmacology and Toxicology, School of Nutrition and Translational Research in Metabolism (NUTRIM), Maastricht University Medical Center +, Maastricht, The Netherlands

<sup>4</sup>Department of Internal Medicine/Cardiology and Angiology, Otto-von-Guericke University, Magdeburg, Germany

<sup>5</sup>Central Facility for Microscopy, Helmholtz Centre for Infection Research, Braunschweig, Germany

<sup>6</sup>Experimental Radiology, Department of Radiology and Nuclear Medicine, Magdeburg, Germany

## Supplemental Tables

| Antibody                            | Company                   | Working concentrations | Cat-number | Clone       |
|-------------------------------------|---------------------------|------------------------|------------|-------------|
| <b>Primary antibodies</b>           |                           |                        |            |             |
| AMPK- $\alpha$                      | Cell signaling Technology | 1:1000                 | 2532       | -           |
| p-AMPK $\alpha$ (Thr172)            | Cell signaling Technology | 1:1000                 | 2535       | 40H9        |
| $\beta$ -Actin                      | Cell signaling Technology | 1:2000-1:5000          | 4970       | 13E5        |
| BNIP3                               | Cell signaling Technology | 1:1000                 | 3769S      | -           |
| BNIP3L                              | Cell signaling Technology | 1:1000                 | 12396      | D4R4B       |
| COXIV                               | Cell signaling Technology | 1:1000                 | 4850       | 3E11        |
| DRP1                                | Cell signaling Technology | 1:1000                 | 8570       | D7C7        |
| ERR $\alpha$                        | Abcam                     | 1:1000                 | ab76228    | EPR46Y      |
| FUNDC1                              | Santa Cruz Biotechnology  | 1:500                  | sc-133597  | H22         |
| GABARAPL1                           | Proteintech Group         | 1:1000                 | 11010-1-AP | -           |
| GAPDH                               | Cell signaling Technology | 1:5000-1:10000         | 5174       | D16H11      |
| HKII                                | Cell signaling Technology | 1:1000                 | 2867       | C64G5       |
| LC3B                                | Cell signaling Technology | 1:1000                 | 2775       | -           |
| MFN2                                | Santa Cruz Biotechnology  | 1:500                  | sc-515647  | F-5         |
| NLRX1                               | Cell signaling Technology | 1:1000                 | 13829      | D4M3Z       |
| NRF1                                | Abcam                     | 1:1000                 | ab55744    | 2F9         |
| OXPHOS subunits                     | MitoScience LLC           | 1:1000                 | MS604      | -           |
| PINK                                | Novus Biologicals         | 1:2000                 | BC100-494  | -           |
| SQSTM1 (p62)                        | Cell signaling Technology | 1:1000                 | 5114       | -           |
| TOMM20                              | Abcam                     | 1:1000                 | ab186734   | EPR15581-39 |
| ULK1                                | Cell signaling Technology | 1:1000                 | 8054       | D8H5        |
| p-ULK1 (Ser555)                     | Cell signaling Technology | 1:1000                 | 5869       | D1H4        |
| VDAC1                               | Cell signaling Technology | 1:500                  | 4866       | -           |
| <b>Secondary antibodies</b>         |                           |                        |            |             |
| Polyclonal Goat anti-Mouse IgG HRP  | Vector laboratories       | 1:10000                | BA-9200    | -           |
| Polyclonal Goat anti-Rabbit IgG HRP | Cell signaling Technology | 1:10000                | 7074S      | -           |
| Polyclonal Swine anti-              | Dako-Agilent              | 1:1000-1:10000         | P0399      | -           |

|                                      |              |                |       |   |
|--------------------------------------|--------------|----------------|-------|---|
| Rabbit IgG HRP                       |              |                |       |   |
| Polyclonal Rabbit anti-Mouse IgG HRP | Dako-Agilent | 1:1000-1:10000 | P0161 | - |

**Table S1:** Antibodies used for immunoblotting. Abbreviations: AMPK $\alpha$ , AMP-activated protein kinase; p-AMPK $\alpha$ , Phosphorylated AMP-activated protein kinase;  $\beta$ -Actin, beta-Actin; BNIP3, BCL2-interacting protein 3; BNIP3L, BCL2 interacting protein 3-like; COXIV, Cytochrome c oxidase subunit IV; DRP1, Dynamin-related protein 1; ERR $\alpha$ , Estrogen-related receptor alpha; FUNDC1, Fun14 domain-containing protein 1; GABARAPL1, Gamma-aminobutyric acid receptor-associated protein-like 1; GAPDH, Glyceraldehyde-3-phosphate dehydrogenase; HKII, hexokinase II; HRP, Horseradish peroxidase; LC3B, Microtubule-associated protein 1A/1B-light chain 3B; MFN2, Mitofusion 2; NLRX1, Nucleotide-binding domain and leucine-rich repeat-containing protein X1; NRF1, Nuclear respiratory factor 1; OXPHOS, Oxidative phosphorylation antibody cocktail (containing SDHB: Succinate dehydrogenase subunit B, UQCRC2: Ubiquinol-cytochrome C reductase core protein 2, ATP5A: adenosine triphosphate 5A); PINK, Phosphatase and tensin homolog (PTEN)-induced kinase; SQSTM1, Sequestosome 1; TOMM20, Translocase of the outer mitochondrial membrane complex subunit 20; ULK1, Unc-51 like autophagy activating kinase 1; p-ULK1, Phosphorylated Unc-51 like autophagy activating kinase 1; VDAC1, Voltage-dependent anion channel 1.

| Antibody                                 | Company                  | Working concentration | Cat-number | Clone    |
|------------------------------------------|--------------------------|-----------------------|------------|----------|
| <b>Primary antibodies</b>                |                          |                       |            |          |
| DRP1                                     | Santa Cruz Biotechnology | 1:50                  | sc-271583  | C-5      |
| p-DRP1 (Ser616)                          | Cell signaling           | 1:300                 | 3455       | -        |
| TOMM20 (F-10)                            | Santa Cruz Biotechnology | 1:50                  | sc-17764   | -        |
| ZO-1                                     | Cell signaling           | 1:400                 | 13663      | D6L1E    |
| E-cadherin                               | Cell signaling           | 1:200                 | 3195       | 24E10    |
| ERR $\alpha$                             | Abcam                    | 1:100                 | EPR46Y     | ab76228  |
| <b>Secondary antibody</b>                |                          |                       |            |          |
| Anti-rabbit IgG Fab2 Alexa fluor (R) 488 | Cell signaling           | 1:1000                | 4412S      | -        |
| Anti-rabbit IgG Fab2 Alexa fluor (R) 647 | Cell signaling           | 1:1000                | 4410S      | -        |
| Alexa fluor 647 Donkey Anti-Rabbit IgG   | Biolegend                | 1:1000                | 406414     | Poly4064 |

**Table S2:** Antibodies used for immunocytochemistry. Abbreviations: DRP1, Dynamin-related protein 1; p-DRP1, phosphorylated dynamin-related protein 1; ERR $\alpha$ , Estrogen-related receptor alpha; TOMM20, Translocase of the outer mitochondrial membrane complex subunit 20; ZO-1, Zonula occludens 1.

## Supplemental Figures and Figures and Legends

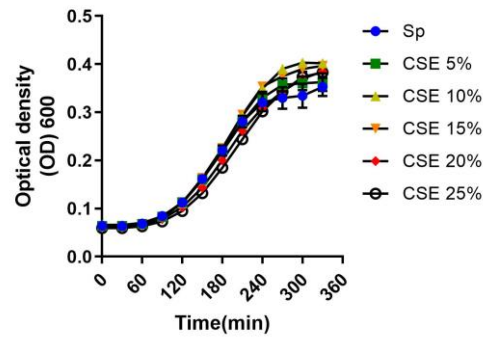

**Figure S1:** Growth curve of *Streptococcus pneumoniae* upon CSE exposure. *Sp* growth curve in presence and absence of different concentrations of cigarette smoke extract (CSE) (5-25%) for 5 h. Data were represented as mean  $\pm$  SEM of triplicate samples for each condition.

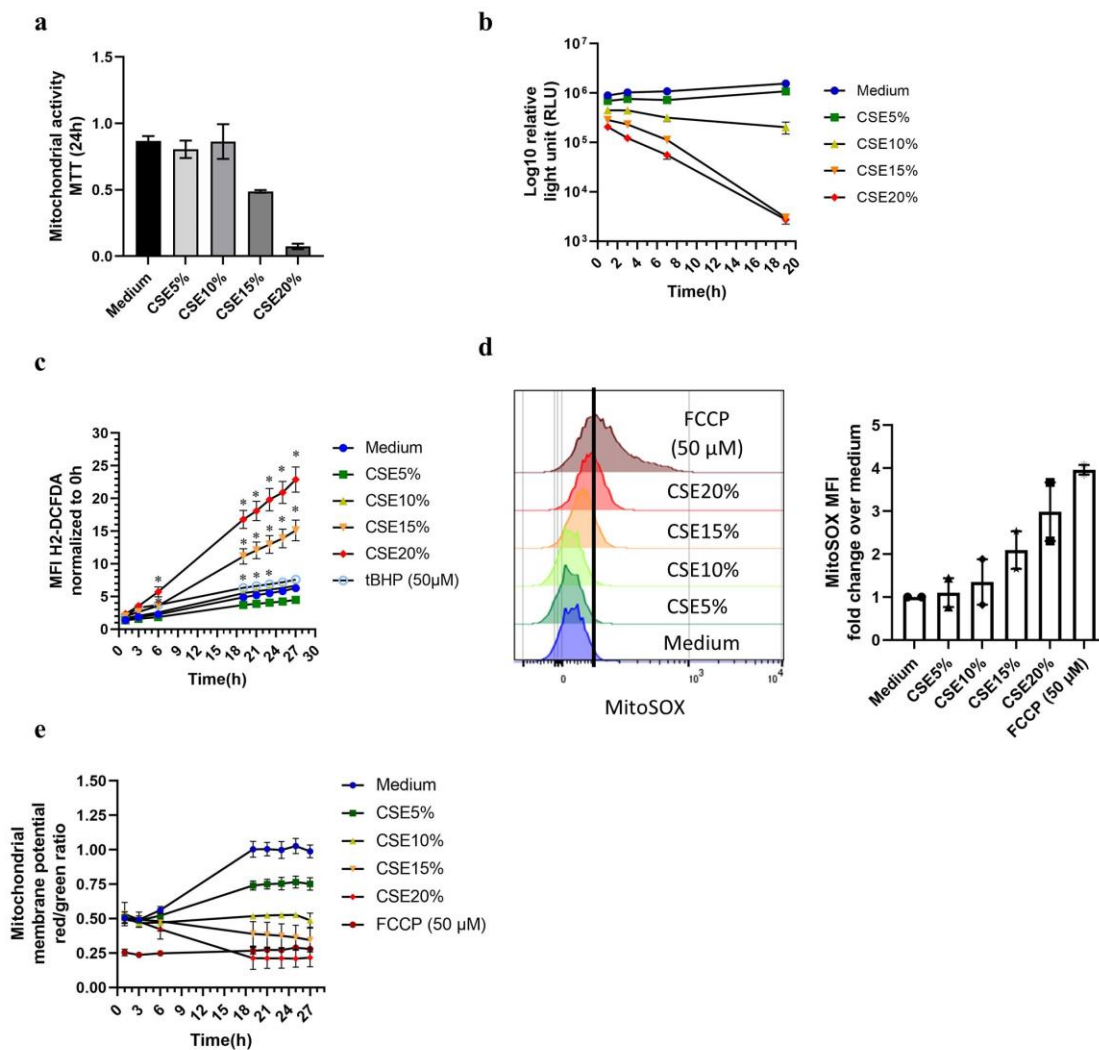

**Figure S2:** Optimization of CSE-induced mitochondrial dysfunction model. 16HBE cells were incubated with medium control or various concentrations of cigarette smoke extract (CSE) (5, 10, 15 and 20%) for 24 h. **a)** Proliferation of the treated 16HBE cells was quantified using 3-(4,5-dimethylthiazole-2-yl) 2,5-diphenyl-2H-tetrazolium bromide (MTT) test. The data is presented as mean of triplicates ( $\pm$  SEM) and representative of one out of two independent experiments with similar outcomes. **b)** Real-Time Glo MT assay for time-point measurement of cell proliferation until time 19 h. The data is representative of one out of two independent experiments with similar outcome in triplicates. **c)** Total reactive oxygen species (ROS) levels analyzed with dichlorodihydrofluorescein diacetate (H2-DCFDA) test presented as mean fluorescent intensity (MFI) of triplicates ( $\pm$  SEM) normalized to measurement at assay start (0 h). Tert-butyl hydroperoxide (tBHP) 50  $\mu$ M was used as positive regulator of ROS. Statistically significant difference was calculated with multiple t-test compared to the medium control (\* $p < 0.05$ ). The data is representative of one out of three independent experiments with similar outcome and in triplicates. **d)** Half offset histogram was used to display shift in the MitoSOX fluorescent signal detected by FACS and analyzed by FlowJo, indicative of changes in mitochondrial ROS levels (left panel) and fold change of MFI MitoSOX upon CSE and carbonyl cyanide-p-trifluoromethoxyphenylhydrazone (FCCP; positive regulator of mitochondrial ROS). MitoSOX MFI fold change was calculated for each condition compared to the medium. The MFI is representative of two independent experiments. **e)** Mitochondrial membrane potential was measured using JC-1 test by dividing J-aggregate (red signal) by monomer (green signal) and normalized to the ratio in the corresponding condition at 0 h. The data is representative of one experiment out of two independent experiments with triplicate samples.

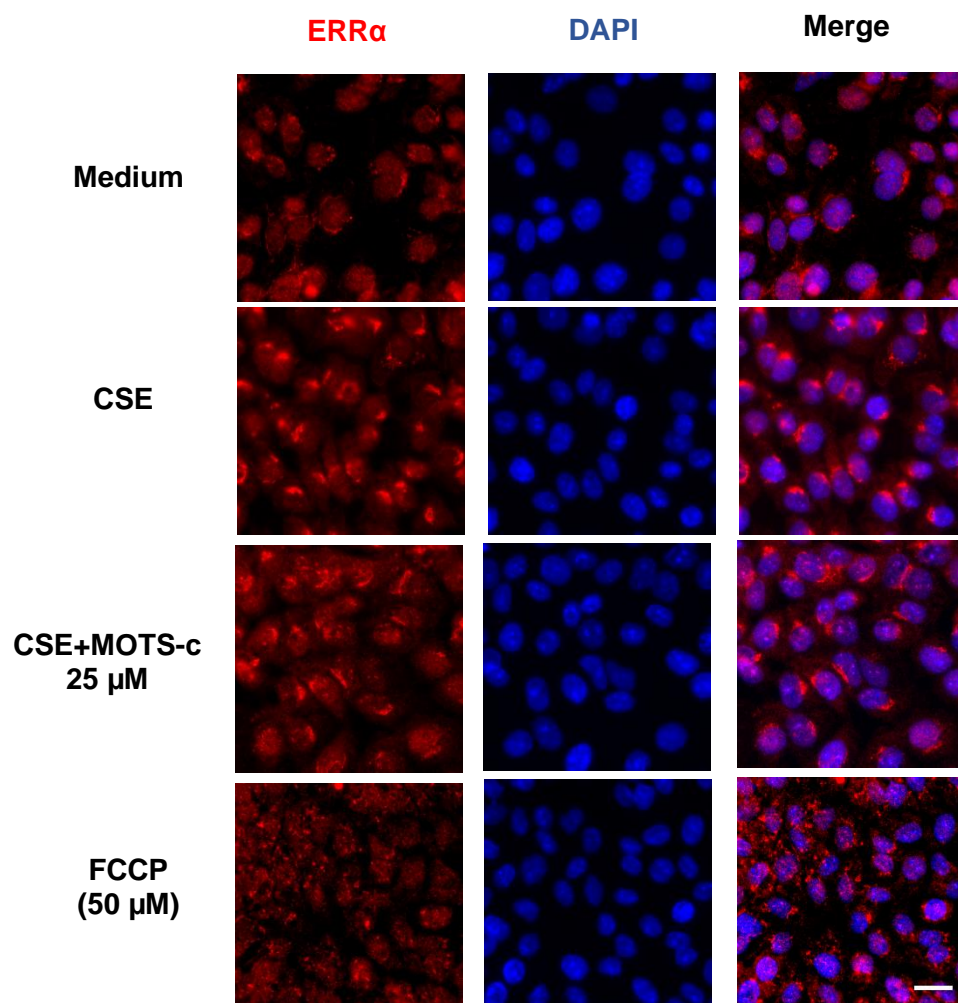

**Figure S3:** Immunostaining for estrogen related receptor  $\alpha$  (ERR $\alpha$ ). The 16HBE cells were stimulated with medium control, cigarette smoke extract (CSE) for 28 h, CSE 24 h followed by mitochondrial ORF of the 12S rRNA type-c (MOTS-c) 25  $\mu$ M for 4 h or with carbonyl cyanide-p-trifluoromethoxyphenylhydrazone (FCCP) 50  $\mu$ M. Immunofluorescence staining was performed using an antibody against ERR $\alpha$  (red) and 4',6-diamidino-2-phenylindole (DAPI) (blue) for nuclei staining. The scale bar is equivalent to 20  $\mu$ m.

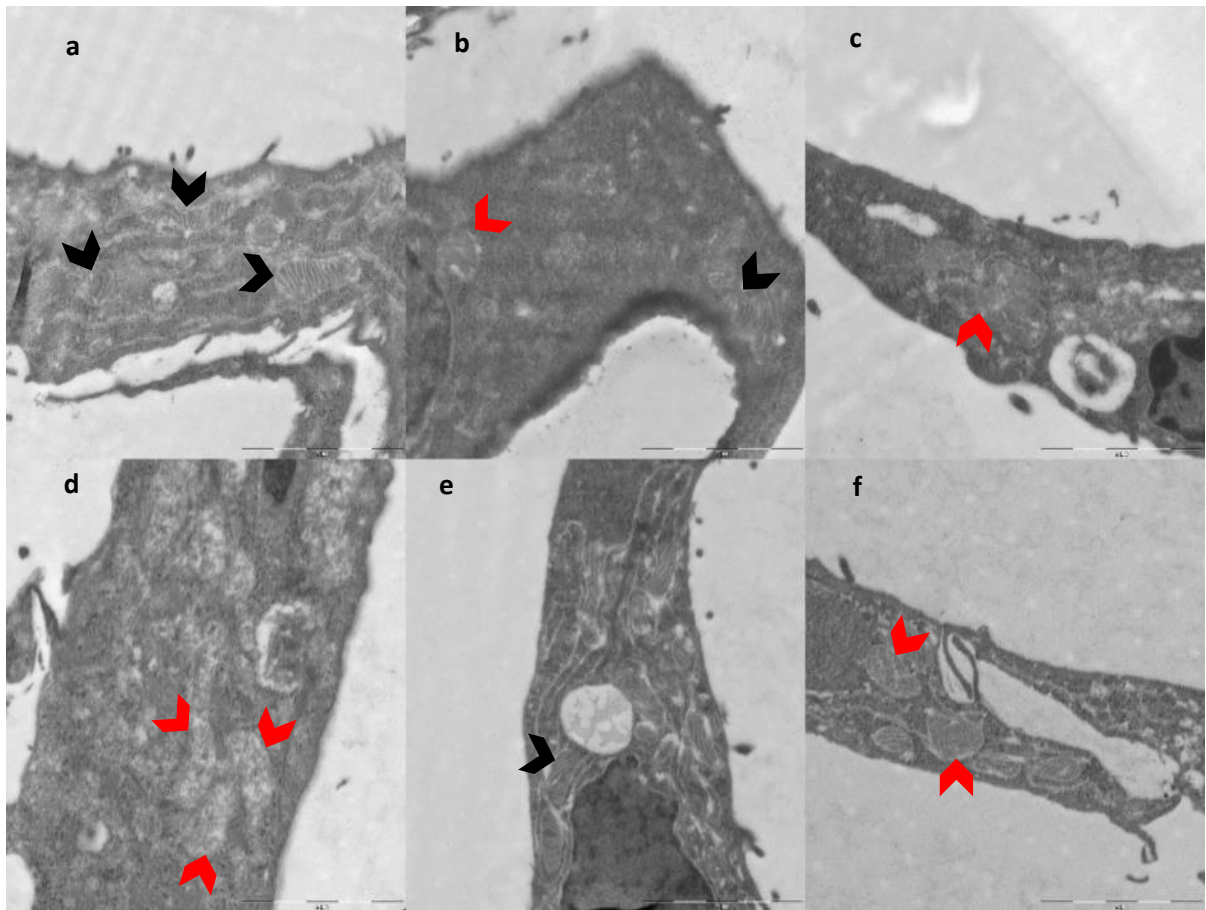

**Figure S4:** Ultrastructure of 16HBE cells upon CSE stimulation and *Streptococcus pneumoniae*. Mitochondrial morphological changes were analyzed under transmission electron microscope (TEM). Dark arrows indicating normal mitochondrial morphology, whereas red arrows showing loss of crista and swollen mitochondria. Representative images of 16HBE cells incubated with **a)** medium for 28 h, **b)** cigarette smoke extract (CSE) for 28 h, **c)** *Streptococcus pneumoniae* (*Sp*) multiplicity of infection (MOI) 10 for 4 h, **d)** CSE for 24 h followed by *Sp* MOI 10 for 4 h **e)**, CSE for 24 h followed by medium for 4 h and **f)** carbonyl cyanide-p-trifluoromethoxyphenylhydrazone (FCCP) 50  $\mu$ M for 4 h. The scale bar is equivalent to 2  $\mu$ m.

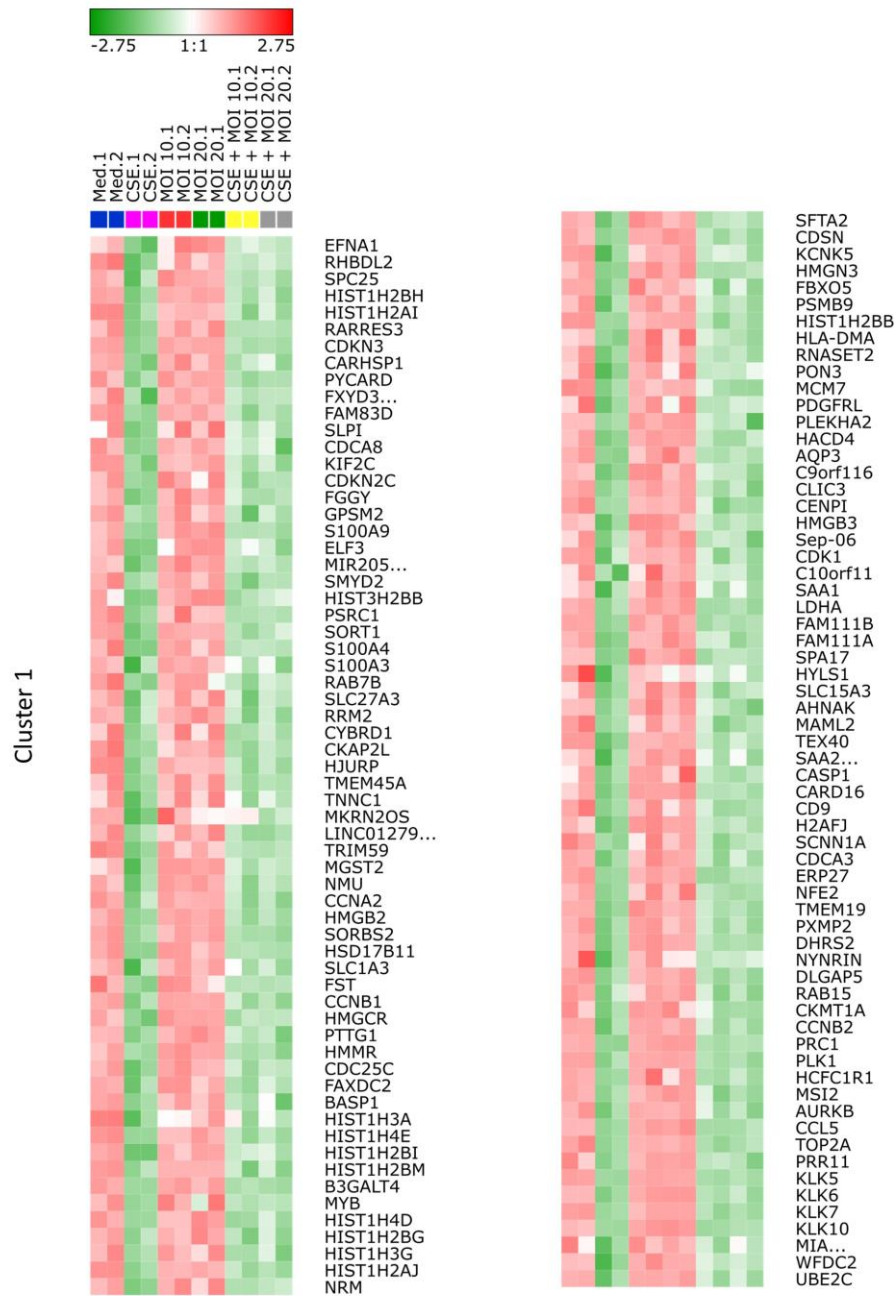

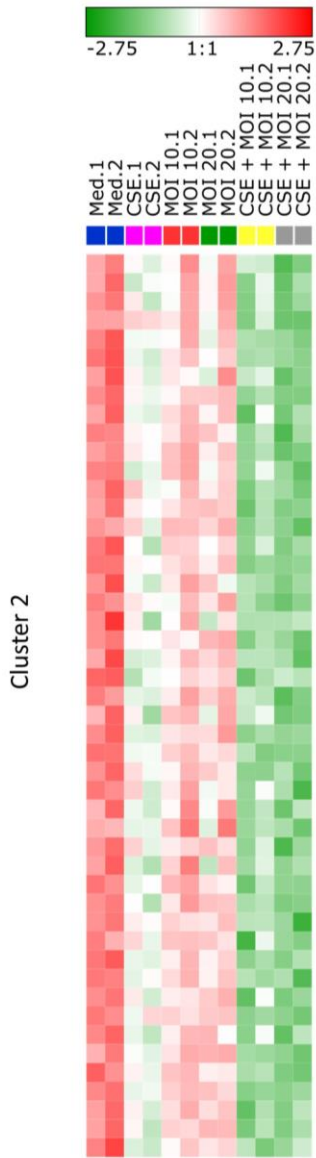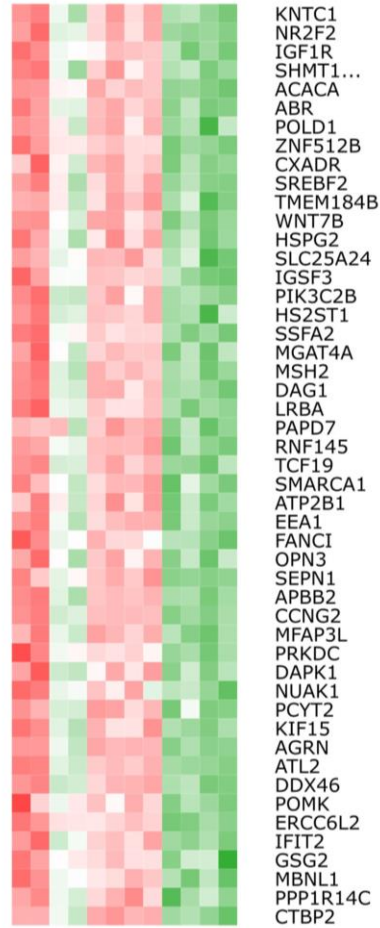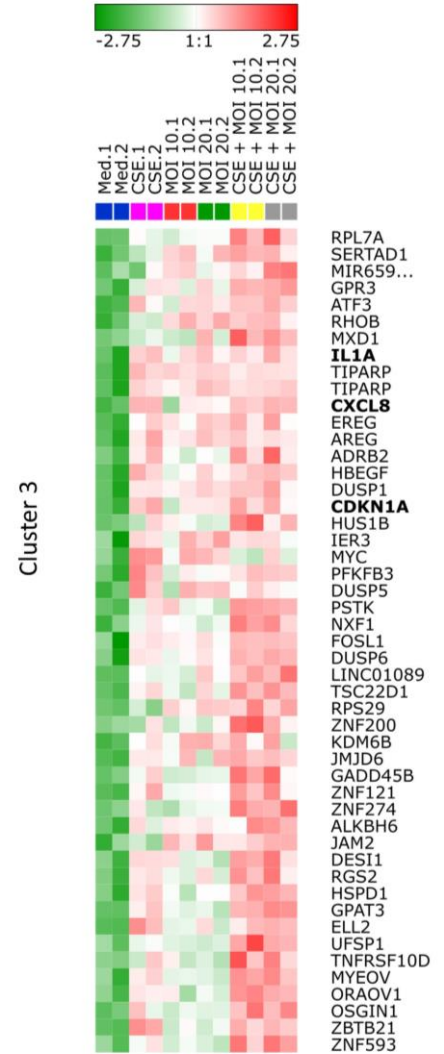

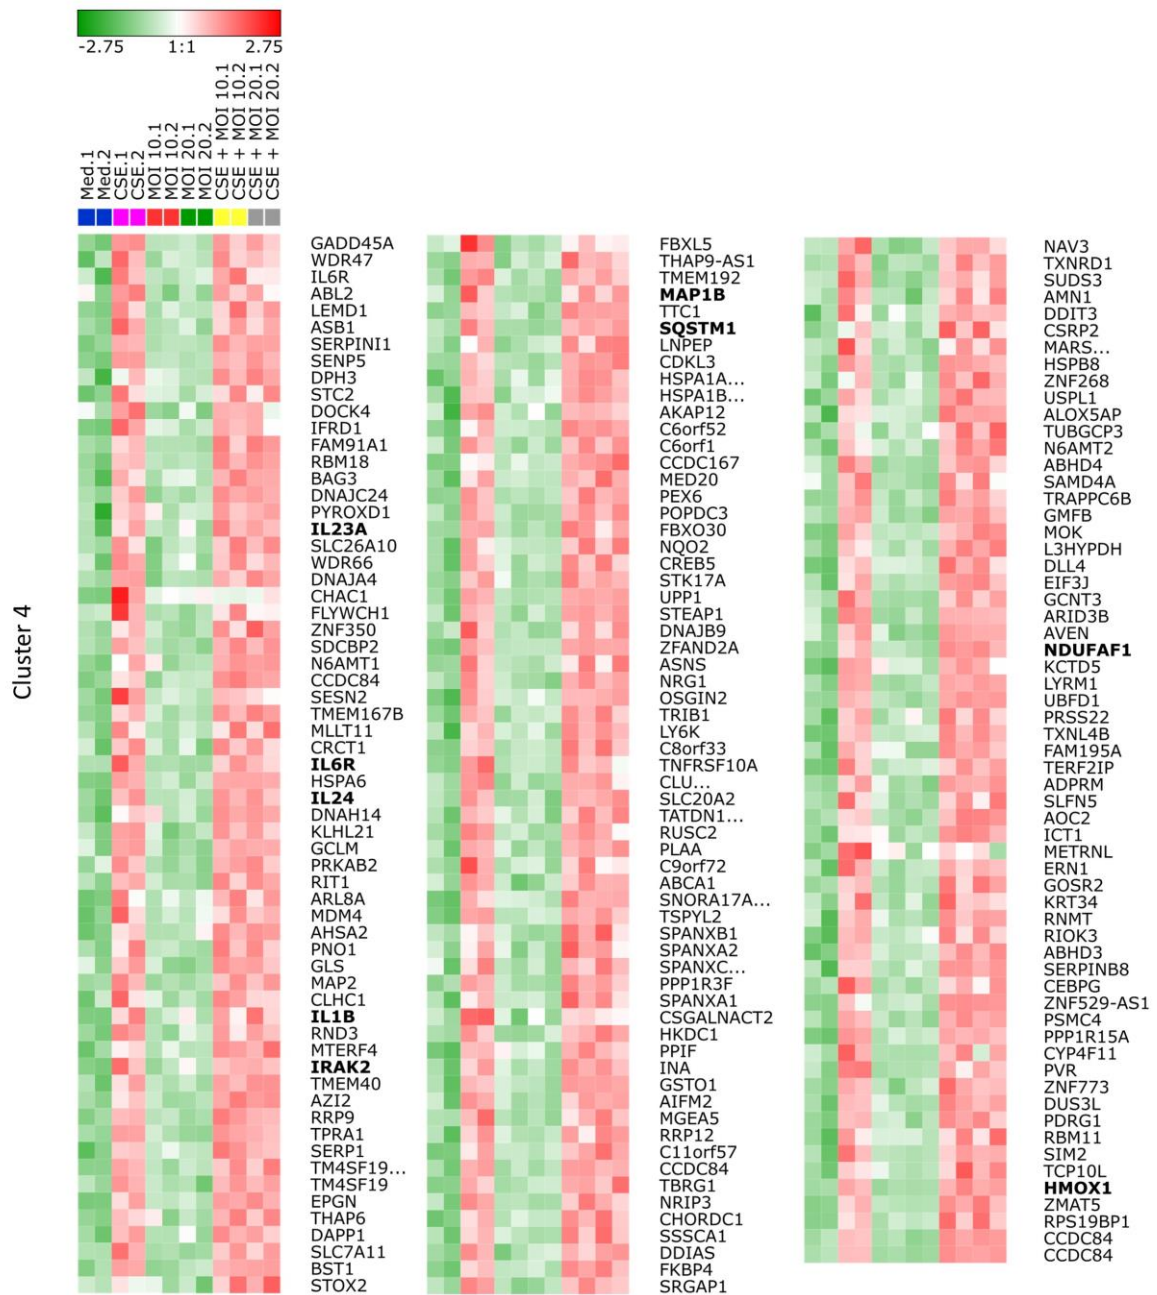

Cluster 5

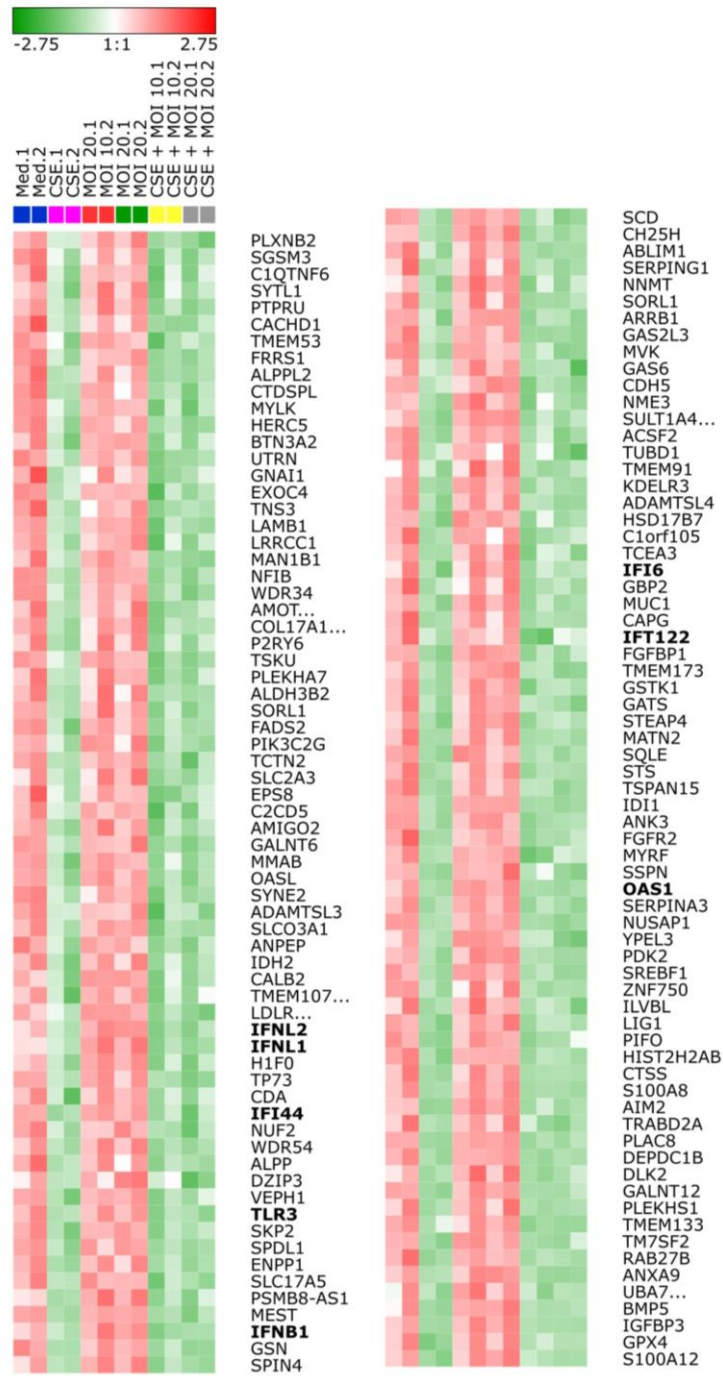

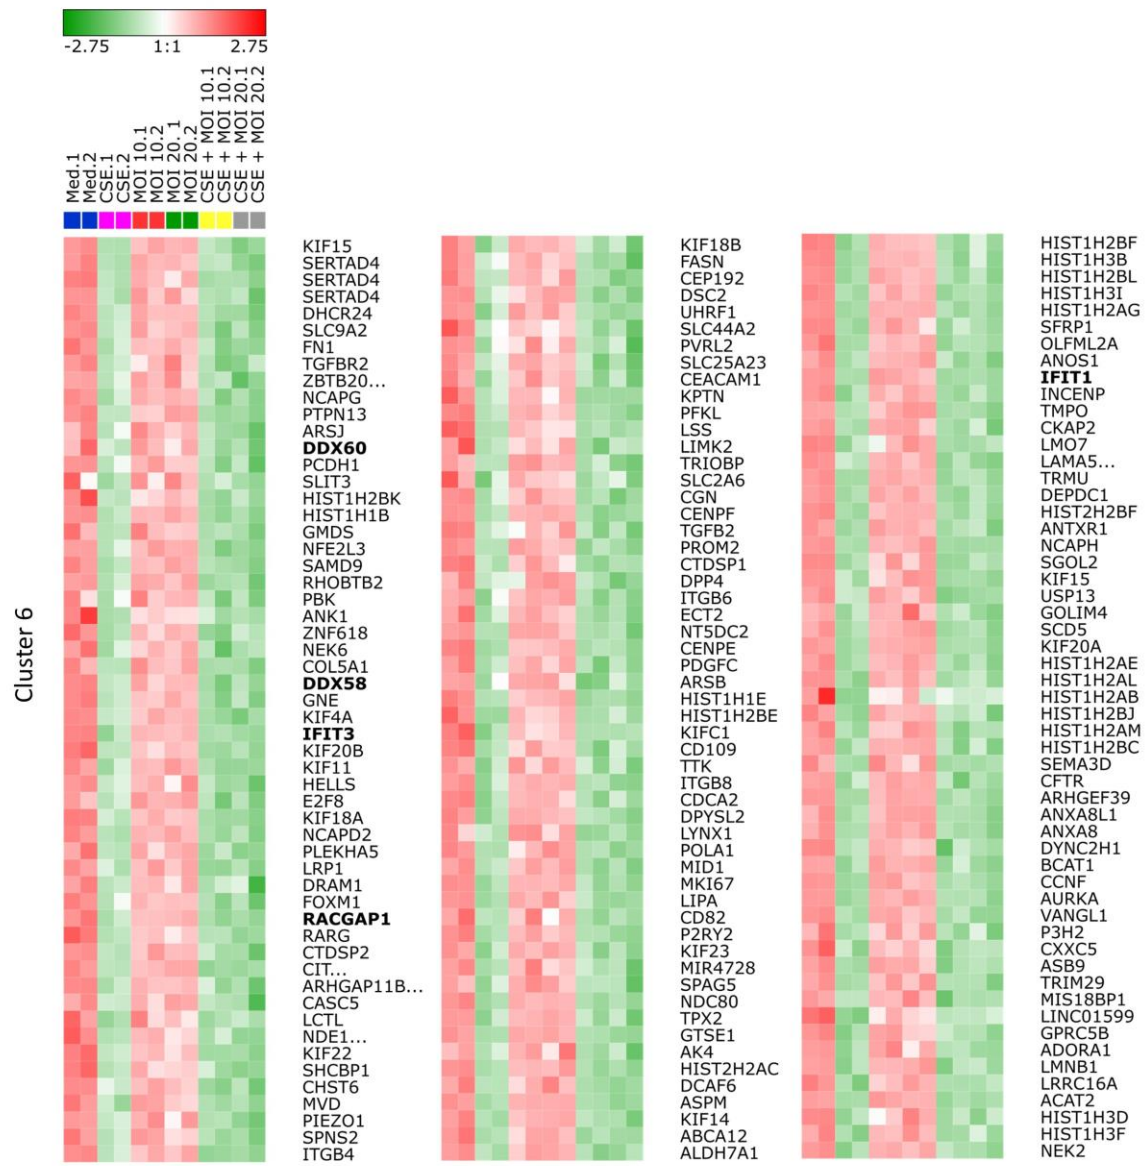

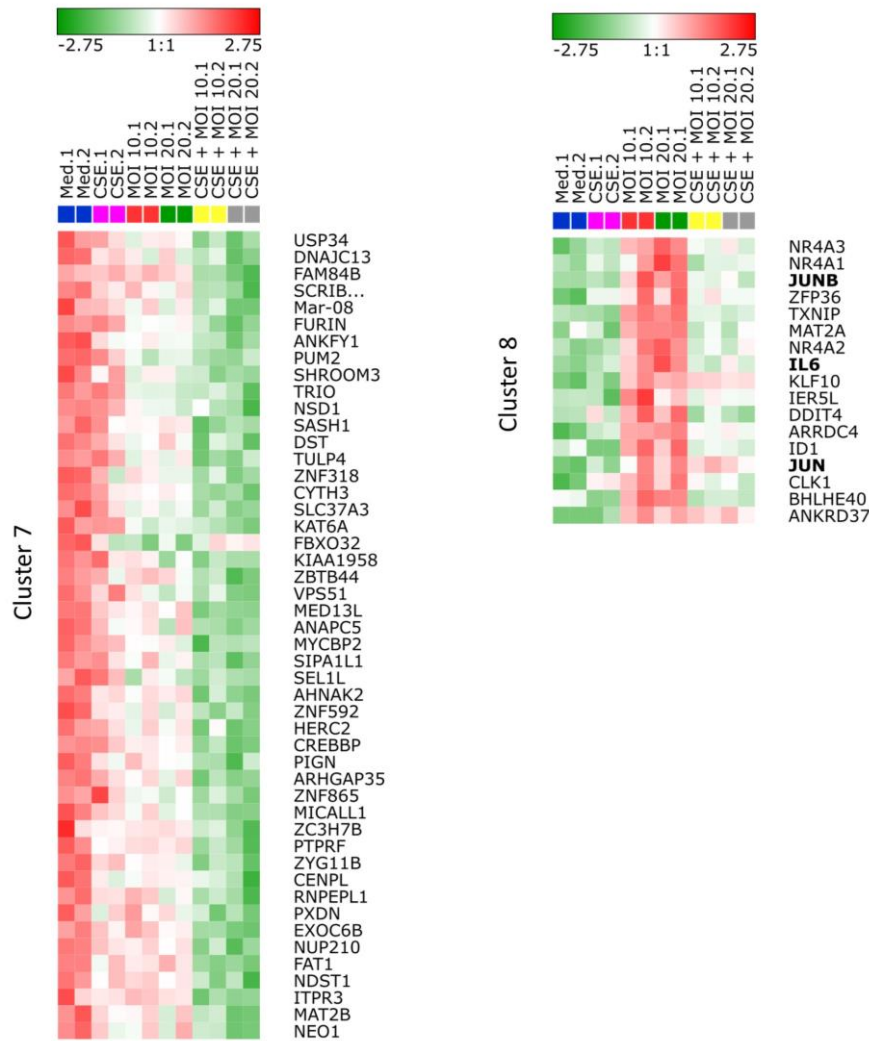

**Figure S5:** Microarray analysis of gene expression upon CSE stimulation and *Streptococcus pneumoniae* infection. 16HBE cells were stimulated with medium (Med) or cigarette smoke extract (CSE) for 28 h, CSE for 24 h followed by medium 4 h (CSE cessation), *Streptococcus pneumoniae* (*Sp*) multiplicities of infection (MOI) of 10 and 20 for 4 h, CSE for 24 h followed by *Sp* MOI 10 and 20 for 4 h. Total RNA was isolated and investigated by using human Clariom S microarray. Differentially expressed transcripts were determined by comparing each condition with medium control (fold change  $\geq 3$ -fold, false discovery rate  $< 0.05$ ).  $\log_2$  signal intensities data of the transcripts were z-score transformed and k-means clustered ( $k = 8$ ), and transcripts in resulting clusters were sorted by maximal absolute z-score (row labels: gene symbols). Data represent color-coded z-scores. Details on bold gene symbols are mentioned in the text.

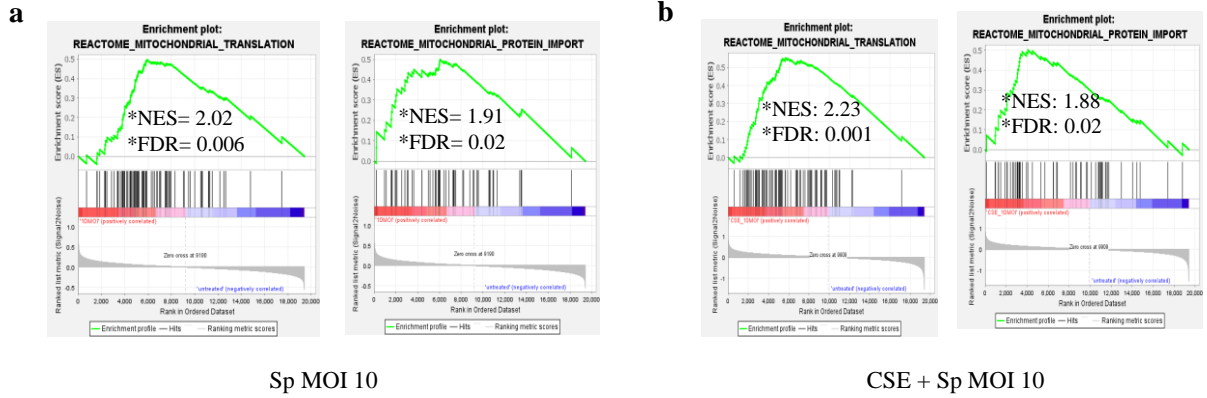

**Figure S6:** Expression of genes regulating mitochondrial function in 16HBE cells upon *Streptococcus pneumoniae* infection with and without CSE pre-exposure. Gene set enrichment analysis (GSEA) for mitochondrial ribosomal translation and mitochondrial import Reactome genes upon **a)** infecting 16HBE cells with *Streptococcus pneumoniae* (*Sp*) multiplicity of infection (MOI) 10 for 4 h and **b)** incubation with cigarette smoke extract (CSE) for 24 h followed by *Sp* infection with MOI 10 for 4 h compared to the untreated medium (ranked by fold change, FDR < 0.1). The data were collected from two independent experiments.

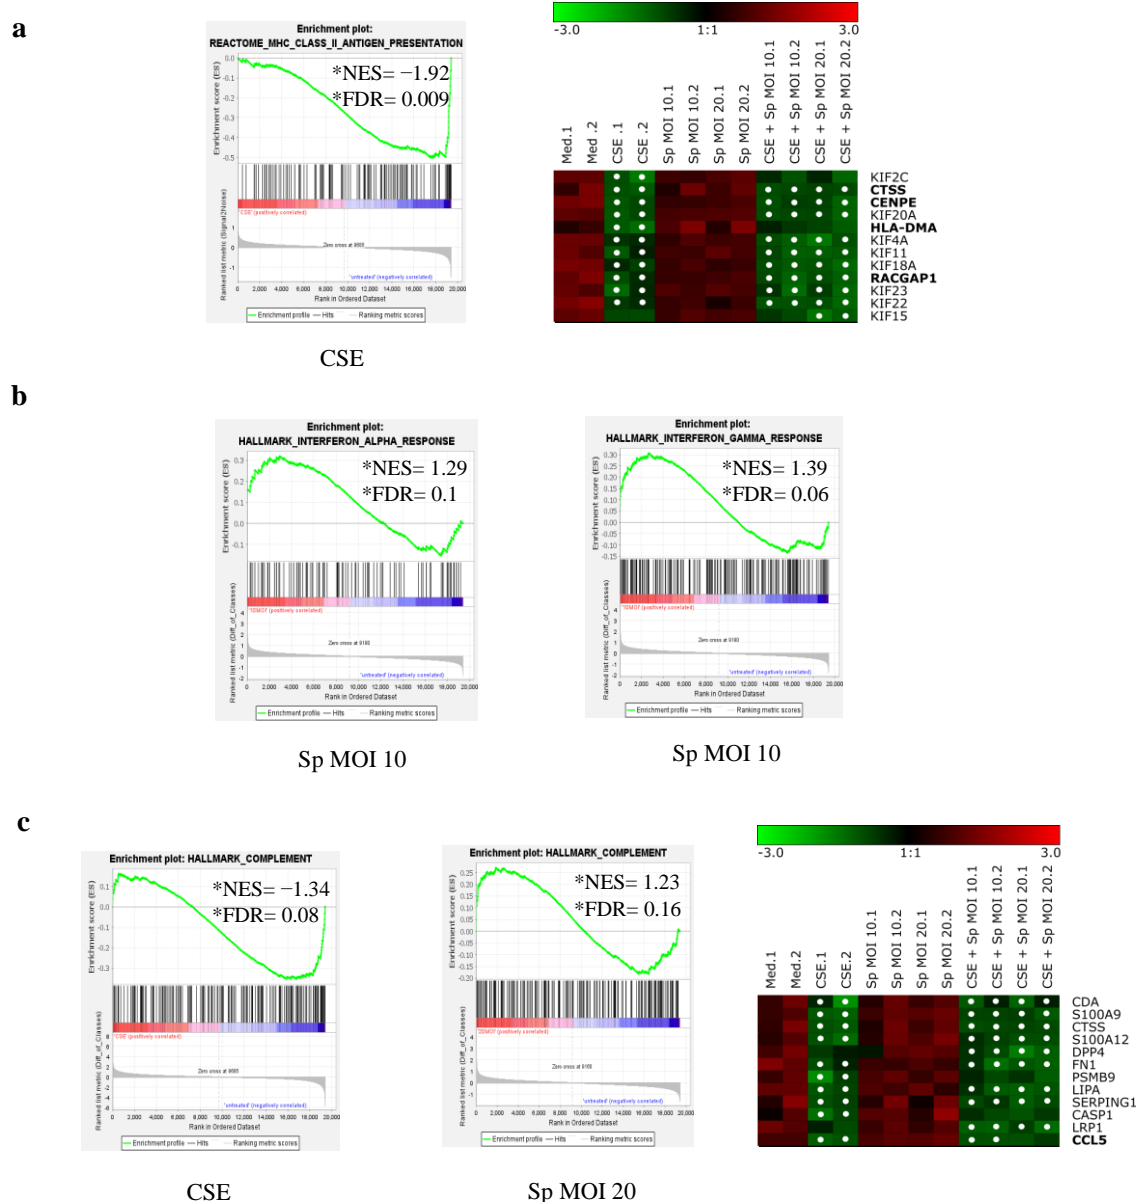

**Figure S7:** Expression of genes regulating innate immune responses upon cigarette smoke extract stimulation and *Streptococcus pneumoniae* infection. **a)** Gene set enrichment analysis (GSEA) for cell surface major histocompatibility complex II (MHCII) in Reactome gene set upon cigarette smoke extract (CSE) stimulation compared to the medium (Med) control. Normalized log<sub>2</sub> signal intensities of core-enriched genes were z-score transformed, color-coded and plotted as heatmap (row labels: gene symbols). Details on bold gene symbols are mentioned in the text. Significance of differential expression with fold change cutoff  $|FC| > 3$  in reference to Med control was calculated by ANOVA ( $p < 0.05$ ). Whitepoints in heatmap plots indicate  $|FC| > 3$  with  $p < 0.05$ . Green/black/red color bars represent z-scores. **b)** GSEA for interferon  $\alpha$  and  $\gamma$  hallmarks upon infection of 16HBE cells with multiplicity of infection (MOI) 10 of *Streptococcus pneumoniae* (Sp). **c)** GSEA for complement hallmarks upon stimulation of 16HBE cells with CSE for 28 h and Sp MOI 20 for 4 h compared to the untreated medium as well as regulated genes in this hallmark calculated by ANOVA ( $p < 0.05$ ). The data were collected from two independent experiments. \*NES: Normalized enrichment score, FDR: false discovery rate.

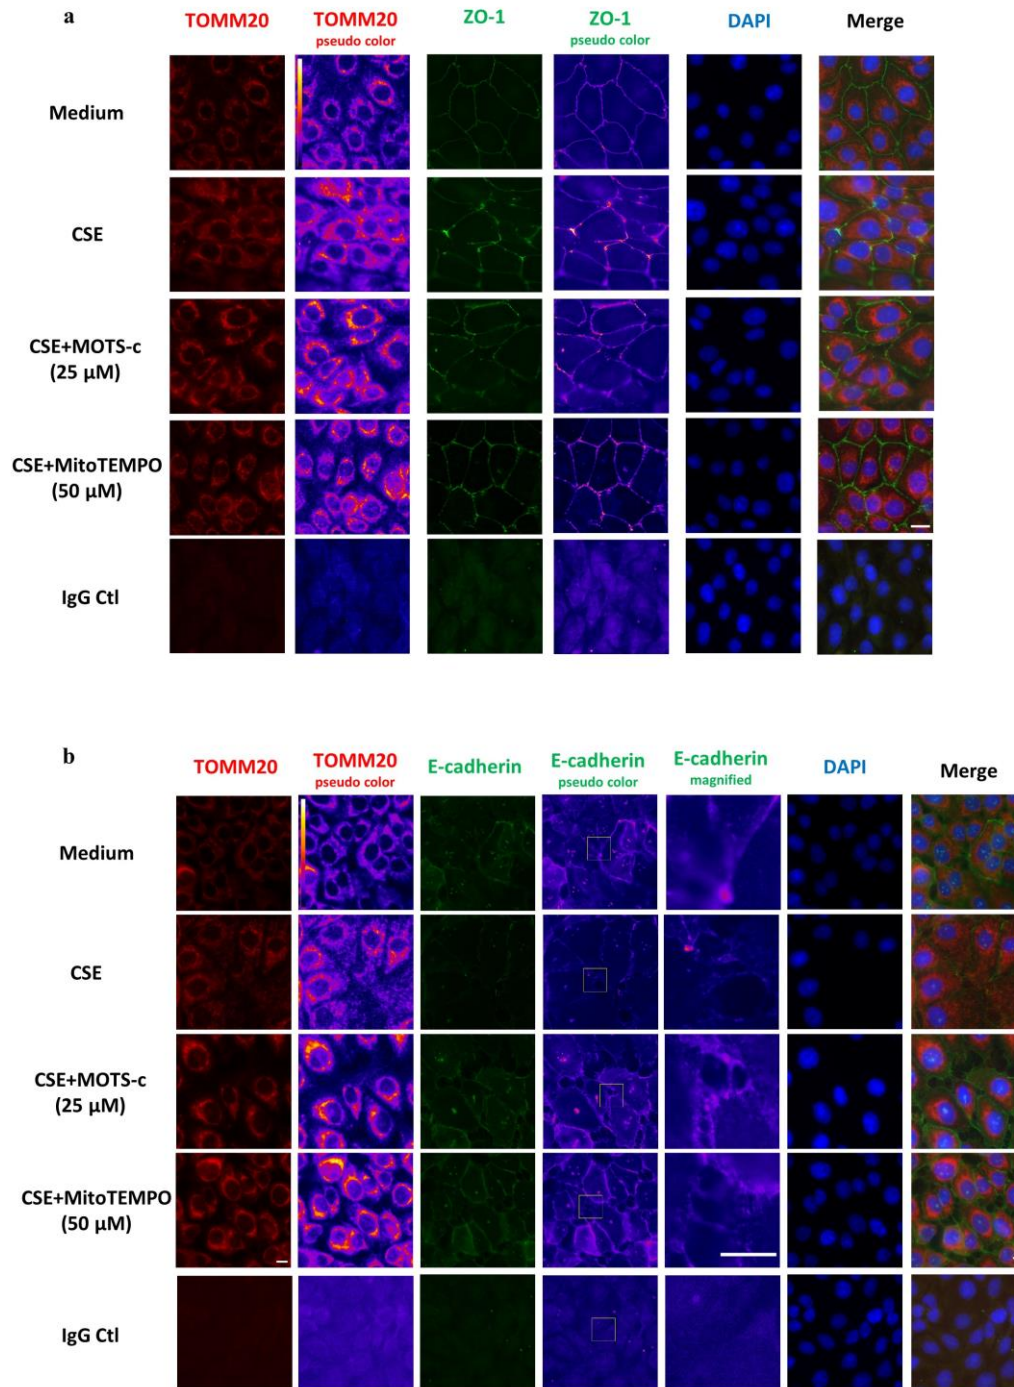

**Figure S8:** Airway epithelial barrier disruption induced by cigarette smoke extract is reversible with mitochondrial-targeted compounds. 16HBE cells incubated for 28 h with medium (control) or cigarette smoke extract (CSE) for 28 h, or for 24 h with CSE followed by incubation for further 4 h with either mitochondrial-targeted compounds MOTS-c (25  $\mu$ M) or MitoTEMPO (50  $\mu$ M). a) Immunofluorescence imaging of treated cells co-stained with antibodies against translocase of the outer mitochondrial membrane complex subunit 20 (TOMM20) in red, tight junction protein zonula occludens (ZO-1) in green or the nucleus with 4',6-diamidino-2-phenylindole (DAPI) for nucleus staining (blue). b) Treated cells were (co-)stained with anti-TOMM20-antibody (red) and anti-E-cadherin-antibody (green) or with

nuclear staining dye DAPI (blue). False color-coded image columns shown here to depict differences in intensities. To visualize the barrier disruption, magnified regions of interest are indicated in the fourth column and shown in column five. Merged images have been gamma corrected to visualize weak signals without losing the highlights. The scale bar is equivalent to 20  $\mu\text{m}$  (a) and 10  $\mu\text{M}$  (b).

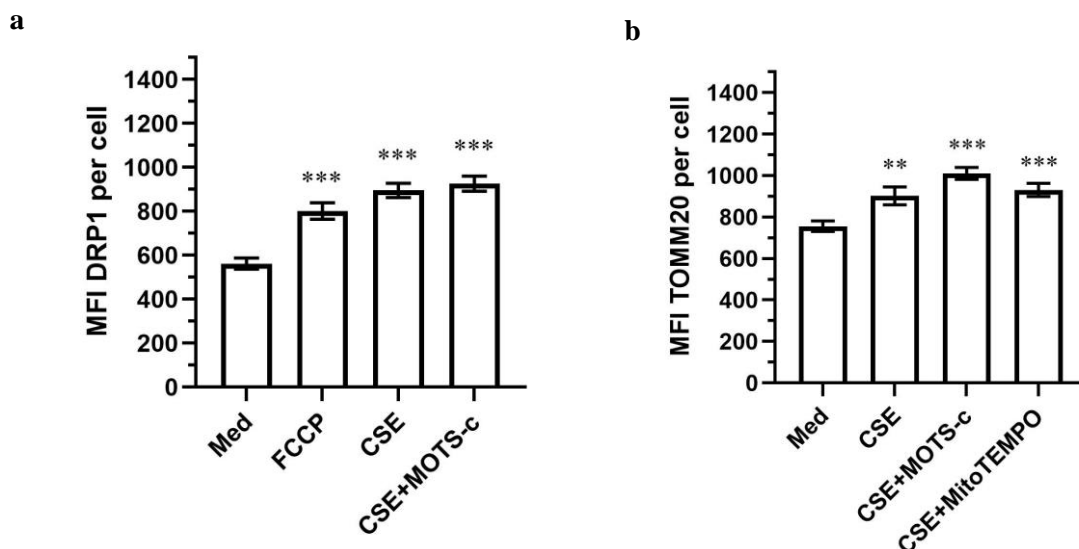

**Figure S9:** Quantification of signal intensities of immunofluorescence staining in 16HBE cells. The cells were stained with antibodies against **a)** dynamin-related protein 1 (DRP1) and **b)** translocase of the outer mitochondrial membrane complex subunit 20 (TOMM20). Mean fluorescence intensity (MFI) was calculated for each cell in the corresponding immunofluorescence images by Fiji software. The statistically significant differences with the medium (Med) were determined by unpaired t-test and using Welch's post-hoc test (\*\*p<0.001, \*\*\*p<0.0001).
